# 1 **Inflammasome-mediated glucose limitation induces antibiotic tolerance in**

## 2 ***Staphylococcus aureus***

3 Jenna E. Beam<sup>1</sup>, Nikki J. Wagner<sup>1</sup>, Kuan-Yi Lu<sup>1</sup>, Sarah E. Rowe<sup>1</sup>, Brian P. Conlon<sup>1,2,\*</sup>

4 <sup>1</sup>Department of Microbiology and Immunology, University of North Carolina-Chapel Hill, Chapel  
5 Hill, North Carolina 27599, USA

6 <sup>2</sup>Marsico Lung Institute, University of North Carolina at Chapel Hill, Chapel Hill, North Carolina  
7 27599, USA

8 \*Corresponding author: [brian\\_conlon@med.unc.edu](mailto:brian_conlon@med.unc.edu)

### 9 **Abstract**

10 *Staphylococcus aureus* is a leading human pathogen that frequently causes relapsing  
11 infections. Host-pathogen interactions have been shown to have substantial impacts on  
12 antibiotic susceptibility and the formation of antibiotic tolerant cells. In this study, we interrogate  
13 how a major *S. aureus* virulence factor,  $\alpha$ -toxin, interacts with macrophages to alter the  
14 microenvironment of the pathogen, thereby influencing its susceptibility to antibiotics. We find  $\alpha$ -  
15 toxin-mediated activation of the NLRP3 inflammasome induces antibiotic tolerance in the host  
16 cell cytoplasm. Induction of antibiotic tolerance is driven by increased glycolysis in the host  
17 cells, resulting in glucose limitation and ATP depletion in *S. aureus*. Additionally, inhibition of  
18 NLRP3 activation improves antibiotic efficacy in vitro and in vivo. Our findings identify  
19 interactions between *S. aureus* and the host that result in metabolic crosstalk that can  
20 determine the outcome of antimicrobial therapy.

### 21 **Introduction**

22 Community-acquired methicillin-resistant *Staphylococcus aureus* (CA-MRSA) is the  
23 causative agent of multiple invasive infections, with high rates of morbidity and mortality

24 (Cosgrove et al., 2003, Kourtis et al., 2019). In 2017, CA-MRSA sepsis contributed to over  
25 20,000 patient deaths in the United States alone (Kourtis et al., 2019). Despite antibiotic therapy  
26 availability, treatment failure is common and often attributed to the formation of antibiotic  
27 tolerant cells (Kourtis et al., 2019, Labreche et al., 2013, Liu et al., 2020).

28 Antibiotic tolerant cells are a subpopulation of bacteria that enter a basal metabolic state,  
29 characterized by low levels of ATP (Rowe et al., 2020, Beam et al., 2021, Conlon et al., 2016,  
30 Huemer et al., 2021). In broth culture, glucose supplementation has been shown to resuscitate  
31 antibiotic tolerant cells by increasing their ATP levels (Conlon et al., 2016). Additionally, we  
32 have previously shown that reactive oxygen species (ROS) induce antibiotic tolerance via  
33 collapse of the tricarboxylic acid (TCA) cycle and ATP depletion (Rowe et al., 2020, Beam et al.,  
34 2021). The addition of exogenous glucose increased antibiotic susceptibility, even in the  
35 absence of a functional TCA cycle (Rowe et al., 2020). *S. aureus* virulence and proliferation in  
36 vivo is highly dependent on glucose, and its four glucose transporters, including 2 newly  
37 acquired and unique to *S. aureus*, demonstrate the importance of glucose acquisition to this  
38 pathogen (Vitko et al., 2015).

39 Due to the limitations of currently-approved antibiotics and a striking lack of new  
40 antibiotics in the pipeline, identifying and developing anti-virulence and/or host-directed  
41 therapeutics for the treatment of bacterial infections is becoming increasingly attractive (Fair and  
42 Tor, 2014, Beam et al., 2021, Cohen et al., 2018, Kane et al., 2018, Hua et al., 2015, Vu et al.,  
43 2020).

44 One of the major classes of virulence factors in MRSA are the pore-forming toxins,  
45 including leukocidins, phenol-soluble modulins,  $\gamma$ -hemolysin, and  $\alpha$ -toxin. These toxins  
46 contribute to host cell death, initiate host cell signaling cascades, such as inflammasome  
47 activation, and mediate pathogen dissemination by facilitating escape from the host cell  
48 (Kebaier et al., 2012, Kitur et al., 2015, Craven et al., 2009, Cohen et al., 2018). Interestingly,

49 antibody-mediated neutralization of  $\alpha$ -toxin has been shown to improve infection outcome  
50 (Cohen et al., 2018, Vu et al., 2020, Hua et al., 2015, Ortines et al., 2018). However, how  
51 neutralization of  $\alpha$ -toxin contributed to improved antibiotic efficacy was not determined.

52  $\alpha$ -toxin-mediated activation of the NOD-like receptor (NLR) pyrin domain-containing  
53 protein 3 (NLRP3) inflammasome contributes to *S. aureus* pathogenicity and immune evasion  
54 (Cohen et al., 2018, Craven et al., 2009, Liu et al., 2021b, Liu et al., 2021a). Once activated, the  
55 NLRP3 oligomerizes with itself and the apoptosis-associated speck-like protein containing a  
56 caspase recruitment domain (ASC) speck, forming the NLRP3 inflammasome. The NLRP3/ASC  
57 protein complex activates caspase-1, which cleaves pro-interleukin-1 beta (pro-IL-1 $\beta$ ) and pro-  
58 IL-18 into mature IL-1 $\beta$  and IL-18, which are then secreted from the host cell. Secretion of IL-1 $\beta$   
59 and IL-18 leads to increased inflammation and neutrophil recruitment to the site(s) of infection  
60 (Miller et al., 2007). The formation of gasdermin D pores downstream of NLRP3 activation can  
61 also result in inflammatory cell death, known as pyroptosis (Aachoui et al., 2013). Additionally,  
62 activation of NLRP3 has been shown to modulate host cell glycolysis (Finucane et al., 2019,  
63 Sanman et al., 2016, Shao et al., 2007). While the interaction between  $\alpha$ -toxin and NLRP3  
64 activation is well documented, the role of this interaction in antibiotic treatment outcome has not  
65 been determined.

66 In the current study, we aimed to determine if  $\alpha$ -toxin-mediated activation of NLRP3  
67 contributes to the formation of antibiotic tolerant *S. aureus* and if targeting activation of the  
68 NLRP3 signaling pathway is a potential host-directed therapeutic strategy that synergizes with  
69 antibiotic treatment.

## 70 **Results**

### 71 **Loss of $\alpha$ -toxin increases antibiotic susceptibility**

72 To determine the role of  $\alpha$ -toxin in antibiotic tolerance, bone marrow-derived  
73 macrophages (BMDMs) and THP-1 human monocyte-derived macrophages (hMDMs) were  
74 infected with *Staphylococcus aureus* wildtype (WT) strain LAC or an  $\alpha$ -toxin deletion mutant,  
75  $\Delta hla$ , followed by treatment with rifampicin (Fig 1AB, SFig1CD) or moxifloxacin (SFig 1A-E).  
76 Both rifampicin and moxifloxacin were chosen as these drugs are bactericidal and readily  
77 penetrate the macrophage by passive diffusion (Acocella et al., 1985, Barcia-Macay et al.,  
78 2006). At 24 hours post-infection (hpi), macrophages were lysed and CFU were enumerated.  
79 Compared to WT LAC, LAC  $\Delta hla$  formed fewer antibiotic tolerant cells in the presence of both  
80 antibiotics (Fig 1, SFig 1).

81 We have previously shown that, in the phagolysosome, high levels of ROS, specifically  
82 peroxynitrite, induces an antibiotic tolerant state in *S. aureus* via collapse of central metabolism  
83 and reduced levels of ATP (Rowe et al., 2020, Beam et al., 2021). Given the high  
84 immunogenicity of  $\alpha$ -toxin, we reasoned that perhaps when  $\alpha$ -toxin is deleted, the macrophages  
85 would be less activated in the presence of the bacteria, leading to lower levels of ROS and thus  
86 decreased induction of antibiotic tolerant bacteria (Park et al., 1999). To measure ROS, BMDMs  
87 were infected with either WT LAC or LAC  $\Delta hla$  for 1h, followed by addition of the ROS-sensitive  
88 luminescent probe L-012 or staining with fluorescein-boronate (FI-B; measures peroxynitrite)  
89 (Rios et al., 2016). Surprisingly, we observed no differences in ROS levels between WT or  $\Delta hla$   
90 infected macrophages (Fig 1C, SFig 1F).

### 91 **Inhibition of NLRP3 increases antibiotic susceptibility**

92 Multiple studies have shown that  $\alpha$ -toxin is a potent activator of the NLRP3  
93 inflammasome (Craven et al., 2009, Cohen et al., 2018, Wang et al., 2020, Munoz-Planillo et al.,  
94 2013). Canonical NLRP3 activation is a two-signal process, where signal 1 is a priming step,  
95 typically toll-like receptor (TLR) signaling downstream of PAMP sensing. This leads to activation  
96 of NF- $\kappa$ b and upregulation of inactive NLRP3 monomers and pro-IL-1 $\beta$  and pro-IL-18. Upon

97 receiving signal 2, NLRP3 becomes active and oligomerizes, which may lead to pyroptosis  
98 (Aachoui et al., 2013, Miller et al., 2007). Signal 2 can be a variety of stimuli, such as changes in  
99 calcium ion flux, mitochondrial damage, or, in the case of  $\alpha$ -toxin, membrane pores that leads to  
100 potassium ion efflux (Craven et al., 2009, Cohen et al., 2018). To examine if NLRP3 activation  
101 contributes to the induction of antibiotic tolerance, we first measured caspase-1 activation and  
102 LDH secretion as proxies for NLRP3 signaling activation following infection with LAC or LAC  
103  $\Delta hla$ . BMDMs infected with WT LAC exhibited increased caspase-1 activation (Fig 2A) and LDH  
104 release (Fig 2B) compared to LAC  $\Delta hla$  infected BMDMs. Next, we treated BMDMs with  
105 inhibitors of NLRP3 signaling, MCC950 or oridonin, prior to infection with LAC and treatment  
106 with rifampicin (Coll et al., 2015, Perera et al., 2018). Inhibition of NLRP3 increased rifampicin  
107 susceptibility in *S. aureus* (Fig 2C, SFig 2AB). Together, these data suggest that NLRP3  
108 activation contributes to the induction of antibiotic tolerance and that inhibition of NLRP3  
109 improves antibiotic efficacy in BMDMs.

#### 110 **$\alpha$ -toxin-mediated NLRP3 activation induces antibiotic tolerance in the host cytoplasm.**

111 Next, we aimed to determine how NLRP3 activation contributes to the induction of  
112 antibiotic tolerance.  $\alpha$ -toxin has been shown to be important for phagosomal escape into the  
113 cytoplasm in non-professional phagocytes (Jarry et al., 2008). To determine if  $\alpha$ -toxin is also  
114 important for phagosomal escape in macrophages, we performed confocal microscopy on  
115 J774A.1 macrophages infected with WT LAC or LAC  $\Delta hla$  strains expressing GFP. By 24hpi,  
116 LAC  $\Delta hla$  was still localized within the phagolysosome while the WT LAC was predominantly  
117 visible in the macrophage cytoplasm (Fig 3A,B). This data indicates that  $\alpha$ -toxin is necessary for  
118 phagosomal escape in macrophages.

119 TLR stimulation by bacterial PAMPS and NLRP3 activation leads to increased host cell  
120 glycolytic activity (Finucane et al., 2019, Sanman et al., 2016, Shao et al., 2007). Additionally, *S.*  
121 *aureus*-infected non-professional phagocytes have been shown to have decreased levels of

122 intracellular glucose (Bravo-Santano et al., 2018). We reasoned that  $\alpha$ -toxin-mediated NLRP3  
123 activation leads to depletion of host cytoplasmic glucose, inducing antibiotic tolerance in *S.*  
124 *aureus* via nutrient deprivation. To test this, we measured glucose uptake into untreated or  
125 MCC950-treated BMDMs following 24h infection with WT LAC using the Glucose Uptake-Glo  
126 assay. After 24h, BMDMs were treated with 2-deoxyglucose (2DG), a glucose analog that is  
127 phosphorylated to 2-deoxyglucose-6-phosphate (2DG6P), but cannot be further metabolized by  
128 the host cell. Addition of glucose-6-phosphate dehydrogenase leads to reduction of NADP<sup>+</sup> to  
129 NADPH, which converts pro-luciferin to luciferin. Relative light units (RLU) are therefore  
130 proportional to 2DG uptake into the host cells, which is indicative of host cell glycolytic activity.  
131 As shown in Figure 3C, BMDMs infected with *S. aureus* exhibit increased glycolytic activity,  
132 which is ameliorated by treatment with MCC950. These data indicate that inhibition of NLRP3  
133 leads to decreased host cell glycolysis, which correlates with reduced antibiotic tolerant cells.  
134 Next, we wanted to measure ATP levels of LAC in untreated or MCC950-treated BMDMs. To  
135 measure ATP, LAC was transduced with a chromosomal *luxABDCE* cassette. The  
136 bioluminescent reaction is ATP-dependent and can thus be used as a proxy for bacterial ATP  
137 levels (Xu et al., 2014). BMDMs were infected with LAC::*lux* for 24h. BMDMs were then lysed  
138 and relative luminescence (RLU) was measured between the two strains. When NLRP3 was  
139 inhibited with MCC950, we observed increased ATP levels, which correlated with reduced to *S.*  
140 *aureus* antibiotic tolerant cells (Fig 3D).

141 To determine if the ability of *S. aureus* to run glycolysis correlates with changes in  
142 antibiotic tolerance, we infected untreated or MCC950-treated BMDMs with WT *S. aureus* strain  
143 JE2 or a glycolysis-deficient *pyk* transposon mutant. We hypothesized that in MCC950-treated  
144 BMDMs cytoplasmic glucose levels would be higher due to decreased host cell glycolysis (Fig  
145 3C). If antibiotic tolerance is induced in the macrophage cytoplasm when *S. aureus* is starved of  
146 glucose, then a glycolysis-deficient mutant should still be tolerant to antibiotics regardless of

147 cytoplasmic glucose availability (treatment with MCC950). Indeed, relative to the WT strain, the  
148 *pyk* mutant *S. aureus* remained tolerant, independent of cytoplasmic glucose availability,  
149 suggesting that the ability of *S. aureus* to catabolize glucose via glycolysis is directly  
150 proportional to the number of antibiotic tolerant cells (Fig 4A, SFig 3A).

151 Next, we wanted to determine if the addition of exogenous glucose could resuscitate and  
152 sensitize the cytoplasmic *S. aureus* antibiotic tolerant cells by stimulating *S. aureus* glycolysis.  
153 BMDMs were infected with WT *S. aureus* followed by treatment with or without rifampicin for  
154 20h. At 20hpi, 0.2% glucose (~0.01M) was added for 4h, at which point macrophages were  
155 lysed and CFU enumerated. Addition of glucose improved rifampicin susceptibility to a similar  
156 level observed with MCC950 treatment (Fig 4B and SFig 3B). This indicates that either blocking  
157 NLRP3-activation of host cell glycolysis or excess glucose is sufficient to sensitize antibiotic  
158 tolerant cells to rifampicin.

159 To further support the idea that glucose availability is a crucial determinant of antibiotic  
160 tolerance, we used rapamycin to repress glucose uptake by macrophages. Rapamycin  
161 selectively targets host cells but not *S. aureus*, thus allowing us to interrogate how the altered  
162 microenvironment affects the formation of antibiotic tolerant cells. To capture the effect of  
163 rapamycin on glucose limitation, infected BMDMs were cultured in a high-glucose medium  
164 (DMEM). In this scenario, we would expect fewer *S. aureus* antibiotic tolerant cells due to the  
165 excess amount of glucose (4.5g/L). Consistent with our hypothesis, there were increased *S.*  
166 *aureus* antibiotic tolerant cells in macrophages treated with rapamycin, highlighting the crucial  
167 role of glucose availability in antibiotic tolerance (Fig 4C, SFig 3CD). As expected, this effect  
168 cannot be readily detected in a low-glucose medium (MEM; SFig 3E). Altogether, these data  
169 suggest that  $\alpha$ -toxin-mediated NLRP3 activation leads to increased host cell glycolysis,  
170 depleting cytosolic glucose levels, leading to reduced antibiotic tolerant cells as a result of  
171 nutrient deprivation following  $\alpha$ -toxin-mediated phagosomal escape.

172 **NLRP3 inhibition improves antibiotic efficacy in murine bacteremia.**

173 To determine if NLRP3 inhibition improves antibiotic efficacy in vivo, we examined  
174 antibiotic treatment outcome in a systemic *S. aureus* infection on WT mice pre-treated with  
175 MCC950. Systemic infection was induced by tail vein intravenous (iv) injection, followed by  
176 treatment with rifampicin. Mice treated with MCC950 prior to infection and treated with rifampicin  
177 had statistically significantly lower bacterial burdens in their livers (Fig 5AB) and spleens (SFig  
178 4) relative to vehicle control or rifampicin alone mice. These data suggest that NLRP3 inhibition  
179 improves antibiotic treatment efficacy against systemic *S. aureus* infection.

180 **Discussion**

181 *S. aureus* causes a variety of chronic and relapsing infections with high rates of antibiotic  
182 treatment failure, morbidity, and mortality. We have previously identified the intracellular niche  
183 as a potent driver of antibiotic tolerance in *S. aureus* (Rowe et al., 2020, Beam et al., 2021).  
184 Here, we find that inflammasome-mediated glucose limitation induces antibiotic tolerance in *S.*  
185 *aureus*.

186 NLRP3 activation is a two-signal process. Signal 1 is a priming step, typically TLR or  
187 other PRR recognition of PAMPs. Signal 2 can be a variety of different stimuli, including  
188 potassium ion efflux mediated by  $\alpha$ -toxin, either directly or via packaging of *S. aureus* virulence  
189 factors in extracellular vesicles that are delivered to macrophages via endocytosis (Craven et  
190 al., 2009, Wang et al., 2020). TLR sensing of bacterial PAMPs, as well as NLRP3 activation,  
191 have been shown to shift macrophage to Warburg metabolism, characterized by increased  
192 glucose utilization and glycolytic flux (Shi et al., 2015, Finucane et al., 2019, Rother et al., 2019,  
193 Sanman et al., 2016, Shao et al., 2007). Additionally,  $\alpha$ -toxin-mediated NLRP3 activation was  
194 recently shown to prevent immune clearance of *S. aureus* by recruiting mitochondria away from  
195 the phagolysosome, reducing mitochondrial ROS production and phagosomal acidification



196 (Cohen et al., 2018). Other studies have shown that antibody neutralization of  $\alpha$ -toxin during *S.*  
197 *aureus* pneumonia infection facilitates immune clearance and prolongs the antibiotic treatment  
198 window (Hua et al., 2015). However, how either NLRP3 activation, host cell metabolism, or  
199 neutralization of  $\alpha$ -toxin impacts antibiotic efficacy has not been reported. Here, we show an  
200 intricate link between NLRP3 activation, host cell metabolism, and  $\alpha$ -toxin wherein  $\alpha$ -toxin  
201 activates NLRP3, increasing host cell glycolytic activity. Increased host cell glycolysis limits  
202 glucose availability for *S. aureus*, leading to cytoplasmic nutrient deprivation and subsequent  
203 tolerance following  $\alpha$ -toxin-dependent phagosomal escape (Fig 6). By blocking NLRP3  
204 activation, we are able to increase antibiotic susceptibility in *S. aureus* by stimulating *S. aureus*  
205 glycolysis.

206         The metabolic versatility of *S. aureus* greatly contributes to its success as a pathogen.  
207 As a facultative anaerobe, *S. aureus* is able to colonize and proliferate in a variety of host  
208 niches. As this and other studies demonstrate, the metabolic lifestyle of *S. aureus* in a given  
209 niche has significant impacts on antibiotic treatment efficacy, underpinning the importance of  
210 studying *S. aureus* antibiotic susceptibility in niche-specific contexts. The link between host cell  
211 metabolism and bacterial metabolism has previously been shown in other pathogens, including  
212 *Pseudomonas aeruginosa*, *Chlamydia trachomatis*, and *Mycobacterium tuberculosis (Mtb)*. A  
213 recent study showed that *P. aeruginosa* in the airway has adapted to utilize itaconate, a host-  
214 derived metabolite that accumulates during the proinflammatory response, as a nutrient source,  
215 leading to increased biofilm formation and chronicity of infection (Riquelme et al., 2020). *C.*  
216 *trachomatis* infection stimulates Warburg metabolism in infected cells, characterized by  
217 increased glycolysis and accumulation of nucleotides, facilitating *C. trachomatis* survival (Rother  
218 et al., 2019). Interestingly, Warburg metabolism was originally identified in tumor cells and is  
219 controlled by the tumor suppressor protein p53. Mutation of p53 in tumor cells leads to  
220 increased proliferation and inhibition of programmed cell death pathways (Vousden and Ryan,

221 2009). As activation of p53 inhibits host cell glycolysis, it reasons that acutely and reversibly  
222 targeting p53 during bacterial infection could improve antibiotic efficacy. In *Mtb* infected  
223 macrophages, interferon- $\gamma$ -dependent hypoxia-inducible factor-1 $\alpha$  (HIF-1 $\alpha$ ) causes a metabolic  
224 shift to aerobic glycolysis, which is essential for controlling *Mtb* infection (Braverman et al.,  
225 2016). HIF-1 $\alpha$  is involved in a positive feedback loop that amplifies the proinflammatory immune  
226 response. Although a robust proinflammatory response was shown to be important for control of  
227 *Mtb* and *S. aureus* burden, it also leads to increased levels of reactive oxygen and nitrogen  
228 species (ROS/RNS). Work from our lab has shown that ROS potently induces antibiotic  
229 tolerance in *S. aureus* and nitric oxide has been shown to antagonize antibiotic killing of *Mtb* -  
230 (Rowe et al., 2020, Beam et al., 2021, Liu et al., 2016), complicating the potential of targeting  
231 HIF-1 $\alpha$  in the presence of antibiotics.

232 Overall, our results identify a complex signaling network whereby interactions between  
233 the *S. aureus* virulence factor  $\alpha$ -toxin and the NLRP3 inflammasome result in metabolic  
234 crosstalk between host and pathogen that profoundly impacts antibiotic treatment efficacy.

## 235 **Materials and Methods**

### 236 **Ethics Statement**

237 All protocols used in this study were approved by the Institutional Animal Care and Use  
238 Committees at the University of North Carolina at Chapel Hill and met guidelines of the US  
239 National Institutes of Health for the humane care of animals.

### 240 **Bacterial Strains and Growth Conditions**

241 *S. aureus* strains HG003, LAC (USA300), LAC::*luxABCDE*, LAC  $\Delta hla$  (Nygaard et al., 2012),  
242 LAC  $\Delta hla phla$  (Nygaard et al., 2012) JE2, JE2 *pyk::erm* were routinely cultured in Mueller  
243 Hinton broth (MHB) at 37 °C and 225 r.p.m.  $\Delta hla$  strains were grown in the presence of  
244 250 $\mu$ g/ml spectinomycin and the complementation strain in 250 $\mu$ g/ml spectinomycin + 20 $\mu$ g/ml

245 chloramphenicol. The transposon mutant JE2 *pyk::erm* was grown with 10µg/ml erythromycin,  
246 and LAC::*luxABCDE* in 10µg/ml chloramphenicol. LAC::*luxABCDE* was created via phage  
247 transduction of the *lux* cassette from JE2::*luxABCDE* (Liu et al., 2017).

#### 248 **BMDM Isolation and Infection**

249 Bone marrow from wildtype (WT) C57BL/6J mice (Jackson Labs) was isolated as described in  
250 (Amend et al., 2016). Bone marrow cells were differentiated for 7 days in Dulbecco's Modified  
251 Eagle Medium (DMEM) + 10% FBS + L-glutamine + sodium pyruvate + sodium bicarbonate +  
252 30% L929-conditioned media. After 7 days, cells were plated at  $4 \times 10^5$  cells/ml in minimum  
253 essential media (MEM) + 10% FBS + L-glutamine (complete MEM) or Dulbecco's Modified  
254 Eagle Medium (DMEM) + 10% FBS + L-glutamine + non-essential amino acids + sodium  
255 pyruvate (complete DMEM) and allowed to adhere overnight at 37°C, 5% CO<sub>2</sub>. For assays with  
256 MCC950 and oridonin, BMDMs were primed for 2h with 100µg/ml lipopolysaccharide (LPS),  
257 followed by 30min treatment with 10µM MCC950 in serum-free media or 5 µM oridonin. Where  
258 indicated, BMDMs were treated with 100ng/ml rapamycin overnight. BMDMs were incubated  
259 with *S. aureus* LAC, LAC  $\Delta hla$ , LAC  $\Delta hla phla$ , JE2, or JE2 *pyk::erm* at MOI 10 for 45min at  
260 37°C, 5% CO<sub>2</sub> to allow for internalization. Media was removed, cells were washed 1x with PBS,  
261 and media was replaced with complete MEM or DMEM as indicated + gentamicin 50µg/ml  
262 and/or rifampicin 10µg/ml and/or 50X MIC moxifloxacin as indicated (Peyrusson et al., 2020,  
263 Beam et al., 2021). For glucose sensitization experiments (Fig 4B), 0.2% (~0.01M) glucose was  
264 added at 20hpi. At indicated timepoints, media was removed, cells were washed 3x with PBS  
265 and macrophages were lysed with 1% triton-x100. CFU were enumerated via dilution plating on  
266 tryptic soy agar (TSA) plates.

#### 267 **THP-1 cell culture and infection**

268 THP-1 monocyte-like cells were cultured in RPMI-1640 + 10% FBS + L-glutamine (complete  
269 RPMI). For differentiation into macrophages, THP-1 cells were seeded at  $4 \times 10^5$  cells/ml in  
270 complete RPMI + 20ng/ml phorbol 12-myristate 13-acetate (PMA) for 24h. After 24h, cells were  
271 weaned in complete MEM for 1h. Cells were infected as above, similarly to BMDM infection.

## 272 **ROS measurement**

273 The luminescent probe L-012 (Wako Chemical Corporation) and fluorescein-boronate  
274 fluorescent (FI-B) probe were used to measure ROS. BMDMs were plated at  $4 \times 10^4$  cells per  
275 well in white tissue-culture-treated 96-well plates. For L-012, the cells were washed three times  
276 with PBS. L-012 was diluted to 150  $\mu$ M in Hanks' balanced salt solution (Gibco). Luminescence  
277 was read immediately using a Biotek Synergy H1 microplate reader. For FI-B, 25 $\mu$ M FI-B was  
278 added and fluorescence was read at 492nm/515nm (excitation/emission) using the plate reader  
279 as above. Data shown are representative of 3 independent assays of 3 biological replicates.  
280 Statistical significance was calculated using student's unpaired t-test.

## 281 **Relative ATP measurement**

282 *S. aureus* strain LAC::*luxABDCE* was used to infect BMDMs at MOI 10 as above. At indicated  
283 timepoints, BMDMs were washed and lysed as described above. Luminescence was read on  
284 Biotek Synergy H1 microplate reader. RLU were normalized to CFU.

## 285 **Glucose Uptake Assay**

286 Untreated or MCC950-treated BMDMs were infected at MOI 10 for 1h with *S. aureus* LAC as  
287 above. After 1h, 50 $\mu$ g/ml gentamicin was added and cells were incubated for 24h. At 24h,  
288 glucose uptake was measured by Glucose Uptake-Glo Assay Kit (Promega) per manufacturer's  
289 instructions.

## 290 **Caspase-1 Activity**

291 Caspase-1 activity was measured in BMDMs infected with LAC or LAC  $\Delta hla$  at MOI 10 as  
292 above. After 1h, 50 $\mu$ g/ml gentamicin was added and cells were incubated for 24h. At 24h,  
293 caspase-1 activity was measured using the Caspase-Glo 1 Inflammasome Assay kit (Promega)  
294 per manufacturer's instructions.

### 295 **Microscopy Sample Preparation**

296 J774A.1 cells were seeded at a density of  $2 \times 10^5$  per well on poly-L-lysine coated number 1.5  
297 glass coverslips in 24 well plates. J774A.1 cells were propagated in complete DMEM and  
298 cultured for assays in complete MEM with 500ng/ml LPS. Cells were infected with either wild  
299 type LAC expressing GFP (LAC-GFP) (Kolaczowska et al., 2015) or  $\Delta hla$  LAC-GFP (this study)  
300 at an MOI of 10. Following infection, plates were spun at 1200xg for 2min. One hour post-  
301 infection (hpi), cells were washed 1x in PBS and media was replaced with MEM supplemented  
302 with lysostaphin 10 $\mu$ g/ml. One hour prior to harvest, lysotracker red (Invitrogen) was added to  
303 indicated samples at 100nM. At either 1 or 24 hpi times, cells were washed 3x with PBS and  
304 fixed with 4% paraformaldehyde at room temperature for 15 min. Fixed cells were washed 3x in  
305 PBS. DAPI was diluted to 2 $\mu$ g/ml in were incubated in PBS + 2% FBS. Samples were incubated  
306 with DAPI for 5 min. Coverslips were washed 3x in PBS and mounted on slides with ProLong  
307 Diamond (Life Technologies). Coverslips were sealed with nail polish before ProLong set to  
308 preserve the depth of the samples. Samples were imaged on a Zeiss LSM 700 Confocal Laser  
309 Scanning Microscope using a 63X/1.4 Plan Apo Oil objective lens and Zeiss ZEN 2011  
310 software.

### 311 **Image Analysis**

312 ImageJ and the plugin DeconvolutionLab2 (Sage, D. et al; Methods; 2017) were used to  
313 deconvolve the images. One slice in the middle of each Z stack was removed and analyzed for  
314 colocalization. EZcolocalization (Stauffer, W et al; Scientific Reports; 2018) was used to

315 measures the overlap in signals above threshold intensity values, generating a Threshold  
316 Overlap Score (TOS) (Sheng, H. et al; Biol Open; 2016). The workflow for analysis was: Select  
317 one plane of the Z stack to analyze from each image. Open the red (Lysotracker) and green (S.  
318 *aureus*) channel images. Regions of interest (ROI) were selected based on the GFP signal of S.  
319 *aureus*. The EZcolocalization plugin was opened and set to analyze reporter 1 (red) and  
320 reporter 2 (green) with the selected ROI as the cell identification input. Thresholds were  
321 automatically determined using the “Default” algorithm. TOS was calculated using the most  
322 intense 10% of pixels in each channel. For every analysis a metric matrix was generated to  
323 show the calculated values over multiple threshold combinations and visually check that the  
324 most appropriate threshold was used for analysis. TOS values were calculated for 295 wild type  
325 LAC-GFP and 424  $\Delta hla$  LAC-GFP. Statistical analysis was performed using an unpaired t-test  
326 using Graph Pad Prism 9 (version 9.3.1).

### 327 **Murine Bacteremia Model**

328 WT C57BL/6J (Jackson #000664) mice were housed in a pathogen-specific free facility. For  
329 mouse infections, 8–10-week-old male and female mice were infected with  $\sim 5 \times 10^6$  CFU of S.  
330 *aureus* strain HG003 in 100 $\mu$ l PBS by intravenous (iv) injection. 1h prior to infection, mice were  
331 administered 50mg/kg MCC950 sodium in PBS (Selleck Chem #CP-456773) by intraperitoneal  
332 (ip) injection. Rifampicin was dissolved in vehicle (6.25% DMSO + 12.5% PEG300) at a final  
333 concentration of 6.25mg/ml. At 24hpi, mice were treated with 25mg/kg rifampicin or vehicle  
334 control by ip injection. At 48hpi, mice were euthanized via CO<sub>2</sub> asphyxiation followed by cervical  
335 dislocation. Spleens and livers were harvested, homogenized, serially diluted, and plated on  
336 TSA plates for enumeration of bacterial CFU. Percent rifampicin tolerant cells was determined  
337 by comparing survivors after rifampicin treatment to survivors of the vehicle treated group. Wild  
338 type mice: vehicle n=9 and rifampicin n=9. The mean is indicated by a horizontal line. Statistical  
339 significance was calculated using the Kruskal Wallis One-Way ANOVA or the Mann-Whitney

340 test as described in the figure legends. Blinding or randomization was not necessary as all  
341 outputs (CFU/g tissue) are objective.

### 342 **Author Contributions**

343 B.P.C, and J.E.B. conceptualized the project; B.P.C, S.E.R., and J.E.B. wrote the manuscript;  
344 J.E.B, N.J.W., and K.L. performed the tissue-culture experiments; J.E.B. performed the animal  
345 experiments; J.E.B. and N.J.W produced figures; B.P.C. and S.E.R. provided funding for the  
346 project.

### 347 **Acknowledgements**

348 This work was supported in part by NIH grants R01AI137273 to B.P.C and R03AI148822 to  
349 S.E.R. and a Burroughs Wellcome Fund investigator in the pathogenesis of infectious disease  
350 (PATH) award to B.P.C. The Microscopy Services Laboratory, Department of Pathology and  
351 Laboratory Medicine is supported in part by P30 CA016086 Cancer Center Core Support Grant  
352 to the UNC Lineberger Comprehensive Cancer Center. We thank Jovanka Voyitch for the  $\alpha$ -  
353 toxin mutant strain, Janelle Arthur for equipment, and Mark Ross for assistance with animal  
354 infections. We thank Roger Plaut for sharing JE2-lux (SAP430). We thank Jenny Ting, Lance  
355 Thurlow, and Janelle Arthur for thoughtful discussions.

### 356 **Competing interests**

357 The authors declare no competing interests.

### 358 **Data availability**

359 Additional data that support the findings of this study are available from the corresponding  
360 author, Brian P. Conlon, upon request ([brian\\_conlon@med.unc.edu](mailto:brian_conlon@med.unc.edu)).

### 361 **References**

- 362 AACHOUI, Y., SAGULENKO, V., MIAO, E. A. & STACEY, K. J. 2013. Inflammasome-mediated pyroptotic and  
363 apoptotic cell death, and defense against infection. *Curr Opin Microbiol*, 16, 319-26.
- 364 ACOCELLA, G., CARLONE, N. A., CUFFINI, A. M. & CAVALLO, G. 1985. The penetration of rifampicin,  
365 pyrazinamide, and pyrazinoic acid into mouse macrophages. *Am Rev Respir Dis*, 132, 1268-73.
- 366 AMEND, S. R., VALKENBURG, K. C. & PIENTA, K. J. 2016. Murine Hind Limb Long Bone Dissection and  
367 Bone Marrow Isolation. *J Vis Exp*.
- 368 BARCIA-MACAY, M., SERAL, C., MINGEOT-LECLERCQ, M. P., TULKENS, P. M. & VAN BAMBEKE, F. 2006.  
369 Pharmacodynamic evaluation of the intracellular activities of antibiotics against *Staphylococcus*  
370 *aureus* in a model of THP-1 macrophages. *Antimicrob Agents Chemother*, 50, 841-51.
- 371 BEAM, J. E., WAGNER, N. J., SHOOK, J. C., BAHNSON, E. S. M., FOWLER, V. G., JR., ROWE, S. E. &  
372 CONLON, B. P. 2021. Macrophage-produced peroxynitrite induces antibiotic tolerance and  
373 supersedes intrinsic mechanisms of persister formation. *Infect Immun*, IAI0028621.
- 374 BRAVERMAN, J., SOGI, K. M., BENJAMIN, D., NOMURA, D. K. & STANLEY, S. A. 2016. HIF-1 $\alpha$  Is an  
375 Essential Mediator of IFN- $\gamma$ -Dependent Immunity to *Mycobacterium tuberculosis*. *J*  
376 *Immunol*, 197, 1287-97.
- 377 BRAVO-SANTANO, N., ELLIS, J. K., MATEOS, L. M., CALLE, Y., KEUN, H. C., BEHRENDTS, V. & LETEK, M.  
378 2018. Intracellular *Staphylococcus aureus* Modulates Host Central Carbon Metabolism To  
379 Activate Autophagy. *mSphere*, 3.
- 380 COHEN, T. S., BOLAND, M. L., BOLAND, B. B., TAKAHASHI, V., TOVCHIGRECHKO, A., LEE, Y., WILDE, A. D.,  
381 MAZAITIS, M. J., JONES-NELSON, O., TKACZYK, C., RAJA, R., STOVER, C. K. & SELLMAN, B. R. 2018.  
382 *S. aureus* Evades Macrophage Killing through NLRP3-Dependent Effects on Mitochondrial  
383 Trafficking. *Cell Rep*, 22, 2431-2441.
- 384 COLL, R. C., ROBERTSON, A. A., CHAE, J. J., HIGGINS, S. C., MUNOZ-PLANILLO, R., INSERRA, M. C., VETTER,  
385 I., DUNGAN, L. S., MONKS, B. G., STUTZ, A., CROKER, D. E., BUTLER, M. S., HANEKLAUS, M.,  
386 SUTTON, C. E., NUNEZ, G., LATZ, E., KASTNER, D. L., MILLS, K. H., MASTERS, S. L., SCHRODER, K.,  
387 COOPER, M. A. & O'NEILL, L. A. 2015. A small-molecule inhibitor of the NLRP3 inflammasome for  
388 the treatment of inflammatory diseases. *Nat Med*, 21, 248-55.
- 389 CONLON, B. P., ROWE, S. E., GANDT, A. B., NUXOLL, A. S., DONEGAN, N. P., ZALIS, E. A., CLAIR, G.,  
390 ADKINS, J. N., CHEUNG, A. L. & LEWIS, K. 2016. Persister formation in *Staphylococcus aureus* is  
391 associated with ATP depletion. *Nat Microbiol*, 1, 16051.
- 392 COSGROVE, S. E., SAKOULAS, G., PERENCEVICH, E. N., SCHWABER, M. J., KARCHMER, A. W. & CARMELI,  
393 Y. 2003. Comparison of mortality associated with methicillin-resistant and methicillin-  
394 susceptible *Staphylococcus aureus* bacteremia: a meta-analysis. *Clin Infect Dis*, 36, 53-9.
- 395 CRAVEN, R. R., GAO, X., ALLEN, I. C., GRIS, D., BUBECK WARDENBURG, J., MCELVANIA-TEKIPPE, E., TING,  
396 J. P. & DUNCAN, J. A. 2009. *Staphylococcus aureus* alpha-hemolysin activates the NLRP3-  
397 inflammasome in human and mouse monocytic cells. *PLoS One*, 4, e7446.
- 398 FAIR, R. J. & TOR, Y. 2014. Antibiotics and bacterial resistance in the 21st century. *Perspect Medicin*  
399 *Chem*, 6, 25-64.
- 400 FINUCANE, O. M., SUGRUE, J., RUBIO-ARAIZ, A., GUILLOT-SESTIER, M. V. & LYNCH, M. A. 2019. The  
401 NLRP3 inflammasome modulates glycolysis by increasing PFKFB3 in an IL-1 $\beta$ -dependent  
402 manner in macrophages. *Sci Rep*, 9, 4034.
- 403 HUA, L., COHEN, T. S., SHI, Y., DATTA, V., HILLIARD, J. J., TKACZYK, C., SUZICH, J., STOVER, C. K. &  
404 SELLMAN, B. R. 2015. MEDI4893\* Promotes Survival and Extends the Antibiotic Treatment  
405 Window in a *Staphylococcus aureus* Immunocompromised Pneumonia Model. *Antimicrob*  
406 *Agents Chemother*, 59, 4526-32.
- 407 HUEMER, M., MAIRPADY SHAMBAT, S., BERGADA-PIJUAN, J., SODERHOLM, S., BOUMASMOUD, M.,  
408 VULIN, C., GOMEZ-MEJIA, A., ANTELO VARELA, M., TRIPATHI, V., GOTSCHI, S., MARQUES  
409 MAGGIO, E., HASSE, B., BRUGGER, S. D., BUMANN, D., SCHUEPBACH, R. A. & ZINKERNAGEL, A. S.



- 410 2021. Molecular reprogramming and phenotype switching in *Staphylococcus aureus* lead to high  
411 antibiotic persistence and affect therapy success. *Proc Natl Acad Sci U S A*, 118.
- 412 JARRY, T. M., MEMMI, G. & CHEUNG, A. L. 2008. The expression of alpha-haemolysin is required for  
413 *Staphylococcus aureus* phagosomal escape after internalization in CFT-1 cells. *Cell Microbiol*, 10,  
414 1801-14.
- 415 KANE, T. L., CAROTHERS, K. E. & LEE, S. W. 2018. Virulence Factor Targeting of the Bacterial Pathogen  
416 *Staphylococcus aureus* for Vaccine and Therapeutics. *Curr Drug Targets*, 19, 111-127.
- 417 KEBAIER, C., CHAMBERLAND, R. R., ALLEN, I. C., GAO, X., BROGLIE, P. M., HALL, J. D., JANIA, C.,  
418 DOERSCHUK, C. M., TILLEY, S. L. & DUNCAN, J. A. 2012. *Staphylococcus aureus* alpha-hemolysin  
419 mediates virulence in a murine model of severe pneumonia through activation of the NLRP3  
420 inflammasome. *J Infect Dis*, 205, 807-17.
- 421 KITUR, K., PARKER, D., NIETO, P., AHN, D. S., COHEN, T. S., CHUNG, S., WACHTEL, S., BUENO, S. &  
422 PRINCE, A. 2015. Toxin-induced necroptosis is a major mechanism of *Staphylococcus aureus*  
423 lung damage. *PLoS Pathog*, 11, e1004820.
- 424 KOLACZKOWSKA, E., JENNE, C. N., SUREWAARD, B. G., THANABALASURIAR, A., LEE, W. Y., SANZ, M. J.,  
425 MOWEN, K., OPDENAKKER, G. & KUBES, P. 2015. Molecular mechanisms of NET formation and  
426 degradation revealed by intravital imaging in the liver vasculature. *Nat Commun*, 6, 6673.
- 427 KOURTIS, A. P., HATFIELD, K., BAGGS, J., MU, Y., SEE, I., EPSON, E., NADLE, J., KAINER, M. A., DUMYATI,  
428 G., PETIT, S., RAY, S. M., EMERGING INFECTIONS PROGRAM, M. A. G., HAM, D., CAPERS, C.,  
429 EWING, H., COFFIN, N., MCDONALD, L. C., JERNIGAN, J. & CARDO, D. 2019. Vital Signs:  
430 Epidemiology and Recent Trends in Methicillin-Resistant and in Methicillin-Susceptible  
431 *Staphylococcus aureus* Bloodstream Infections - United States. *MMWR Morb Mortal Wkly Rep*,  
432 68, 214-219.
- 433 LABRECHE, M. J., LEE, G. C., ATTRIDGE, R. T., MORTENSEN, E. M., KOELLER, J., DU, L. C., NYREN, N. R.,  
434 TREVINO, L. B., TREVINO, S. B., PENA, J., MANN, M. W., MUNOZ, A., MARCOS, Y., ROCHA, G.,  
435 KORETSKY, S., ESPARZA, S., FINNIE, M., DALLAS, S. D., PARCHMAN, M. L. & FREI, C. R. 2013.  
436 Treatment failure and costs in patients with methicillin-resistant *Staphylococcus aureus* (MRSA)  
437 skin and soft tissue infections: a South Texas Ambulatory Research Network (STARNet) study. *J*  
438 *Am Board Fam Med*, 26, 508-17.
- 439 LIU, C., HAO, K., LIU, Z., LIU, Z. & GUO, N. 2021a. Epigallocatechin gallate (EGCG) attenuates  
440 staphylococcal alpha-hemolysin (Hla)-induced NLRP3 inflammasome activation via ROS-MAPK  
441 pathways and EGCG-Hla interactions. *Int Immunopharmacol*, 100, 108170.
- 442 LIU, H., ARCHER, N. K., DILLEN, C. A., WANG, Y., ASHBAUGH, A. G., ORTINES, R. V., KAO, T., LEE, S. K., CAI,  
443 S. S., MILLER, R. J., MARCHITTO, M. C., ZHANG, E., RIGGINS, D. P., PLAUT, R. D., STIBITZ, S.,  
444 GEHA, R. S. & MILLER, L. S. 2017. *Staphylococcus aureus* Epicutaneous Exposure Drives Skin  
445 Inflammation via IL-36-Mediated T Cell Responses. *Cell Host Microbe*, 22, 653-666 e5.
- 446 LIU, J., GEFEN, O., RONIN, I., BAR-MEIR, M. & BALABAN, N. Q. 2020. Effect of tolerance on the evolution  
447 of antibiotic resistance under drug combinations. *Science*, 367, 200-204.
- 448 LIU, R., LIU, Y., LIU, C., GAO, A., WANG, L., TANG, H., WU, Q., WANG, X., TIAN, D., QI, Z. & SHEN, Y.  
449 2021b. NEK7-Mediated Activation of NLRP3 Inflammasome Is Coordinated by Potassium  
450 Efflux/Syk/JNK Signaling During *Staphylococcus aureus* Infection. *Front Immunol*, 12, 747370.
- 451 LIU, Y., TAN, S., HUANG, L., ABRAMOVITCH, R. B., ROHDE, K. H., ZIMMERMAN, M. D., CHEN, C., DARTOIS,  
452 V., VANDERVEN, B. C. & RUSSELL, D. G. 2016. Immune activation of the host cell induces drug  
453 tolerance in *Mycobacterium tuberculosis* both in vitro and in vivo. *J Exp Med*, 213, 809-25.
- 454 MILLER, L. S., PIETRAS, E. M., URICCHIO, L. H., HIRANO, K., RAO, S., LIN, H., O'CONNELL, R. M., IWAKURA,  
455 Y., CHEUNG, A. L., CHENG, G. & MODLIN, R. L. 2007. Inflammasome-mediated production of IL-  
456 1beta is required for neutrophil recruitment against *Staphylococcus aureus* in vivo. *J Immunol*,  
457 179, 6933-42.

- 458 MUNOZ-PLANILLO, R., KUFFA, P., MARTINEZ-COLON, G., SMITH, B. L., RAJENDIRAN, T. M. & NUNEZ, G.  
459 2013. K(+) efflux is the common trigger of NLRP3 inflammasome activation by bacterial toxins  
460 and particulate matter. *Immunity*, 38, 1142-53.
- 461 NYGAARD, T. K., PALLISTER, K. B., DUMONT, A. L., DEWALD, M., WATKINS, R. L., PALLISTER, E. Q.,  
462 MALONE, C., GRIFFITH, S., HORSWILL, A. R., TORRES, V. J. & VOYICH, J. M. 2012. Alpha-toxin  
463 induces programmed cell death of human T cells, B cells, and monocytes during USA300  
464 infection. *PLoS One*, 7, e36532.
- 465 ORTINES, R. V., LIU, H., CHENG, L. I., COHEN, T. S., LAWLOR, H., GAMI, A., WANG, Y., DILLEN, C. A.,  
466 ARCHER, N. K., MILLER, R. J., ASHBAUGH, A. G., PINSKER, B. L., MARCHITTO, M. C., TKACZYK, C.,  
467 STOVER, C. K., SELLMAN, B. R. & MILLER, L. S. 2018. Neutralizing Alpha-Toxin Accelerates Healing  
468 of Staphylococcus aureus-Infected Wounds in Nondiabetic and Diabetic Mice. *Antimicrob Agents*  
469 *Chemother*, 62.
- 470 PARK, H. M., YOO, H. S., OH, T. H., KIM, D. & HAN, H. R. 1999. Immunogenicity of alpha-toxin, capsular  
471 polysaccharide (CPS) and recombinant fibronectin-binding protein (r-FnBP) of Staphylococcus  
472 aureus in rabbit. *J Vet Med Sci*, 61, 995-1000.
- 473 PERERA, A. P., FERNANDO, R., SHINDE, T., GUNDAMARAJU, R., SOUTHAM, B., SOHAL, S. S., ROBERTSON,  
474 A. A. B., SCHRODER, K., KUNDE, D. & ERI, R. 2018. MCC950, a specific small molecule inhibitor of  
475 NLRP3 inflammasome attenuates colonic inflammation in spontaneous colitis mice. *Sci Rep*, 8,  
476 8618.
- 477 PEYRUSSON, F., VARET, H., NGUYEN, T. K., LEGENDRE, R., SISMEIRO, O., COPPEE, J. Y., WOLZ, C.,  
478 TENSION, T. & VAN BAMBEKE, F. 2020. Intracellular Staphylococcus aureus persists upon  
479 antibiotic exposure. *Nat Commun*, 11, 2200.
- 480 RIOS, N., PIACENZA, L., TRUJILLO, M., MARTINEZ, A., DEMICHELI, V., PROLO, C., ALVAREZ, M. N., LOPEZ,  
481 G. V. & RADI, R. 2016. Sensitive detection and estimation of cell-derived peroxynitrite fluxes  
482 using fluorescein-boronate. *Free Radic Biol Med*, 101, 284-295.
- 483 RIQUELME, S. A., LIIMATTA, K., WONG FOK LUNG, T., FIELDS, B., AHN, D., CHEN, D., LOZANO, C., SAENZ,  
484 Y., UHLEMANN, A. C., KAHL, B. C., BRITTO, C. J., DIMANGO, E. & PRINCE, A. 2020. Pseudomonas  
485 aeruginosa Utilizes Host-Derived Itaconate to Redirect Its Metabolism to Promote Biofilm  
486 Formation. *Cell Metab*, 31, 1091-1106 e6.
- 487 ROTHER, M., TEIXEIRA DA COSTA, A. R., ZIETLOW, R., MEYER, T. F. & RUDEL, T. 2019. Modulation of Host  
488 Cell Metabolism by Chlamydia trachomatis. *Microbiol Spectr*, 7.
- 489 ROWE, S. E., WAGNER, N. J., LI, L., BEAM, J. E., WILKINSON, A. D., RADLINSKI, L. C., ZHANG, Q., MIAO, E.  
490 A. & CONLON, B. P. 2020. Reactive oxygen species induce antibiotic tolerance during systemic  
491 Staphylococcus aureus infection. *Nat Microbiol*, 5, 282-290.
- 492 SANMAN, L. E., QIAN, Y., EISELE, N. A., NG, T. M., VAN DER LINDEN, W. A., MONACK, D. M.,  
493 WEERAPANA, E. & BOGYO, M. 2016. Disruption of glycolytic flux is a signal for inflammasome  
494 signaling and pyroptotic cell death. *Elife*, 5, e13663.
- 495 SHAO, W., YERETSIAN, G., DOIRON, K., HUSSAIN, S. N. & SALEH, M. 2007. The caspase-1 digestome  
496 identifies the glycolysis pathway as a target during infection and septic shock. *J Biol Chem*, 282,  
497 36321-9.
- 498 SHI, L., SALAMON, H., EUGENIN, E. A., PINE, R., COOPER, A. & GENNARO, M. L. 2015. Infection with  
499 Mycobacterium tuberculosis induces the Warburg effect in mouse lungs. *Sci Rep*, 5, 18176.
- 500 VITKO, N. P., SPAHICH, N. A. & RICHARDSON, A. R. 2015. Glycolytic dependency of high-level nitric oxide  
501 resistance and virulence in Staphylococcus aureus. *MBio*, 6.
- 502 VOUSDEN, K. H. & RYAN, K. M. 2009. p53 and metabolism. *Nat Rev Cancer*, 9, 691-700.
- 503 VU, T. T. T., NGUYEN, N. T. Q., TRAN, V. G., GRAS, E., MAO, Y., JUNG, D. H., TKACZYK, C., SELLMAN, B. R.  
504 & DIEP, B. A. 2020. Protective Efficacy of Monoclonal Antibodies Neutralizing Alpha-Hemolysin

505           and Bicomponent Leukocidins in a Rabbit Model of *Staphylococcus aureus* Necrotizing  
506           Pneumonia. *Antimicrob Agents Chemother*, 64.  
507   WANG, X., EAGEN, W. J. & LEE, J. C. 2020. Orchestration of human macrophage NLRP3 inflammasome  
508           activation by *Staphylococcus aureus* extracellular vesicles. *Proc Natl Acad Sci U S A*, 117, 3174-  
509           3184.  
510   XU, T., RIPP, S., SAYLER, G. S. & CLOSE, D. M. 2014. Expression of a humanized viral 2A-mediated lux  
511           operon efficiently generates autonomous bioluminescence in human cells. *PLoS One*, 9, e96347.  
512  
  
513

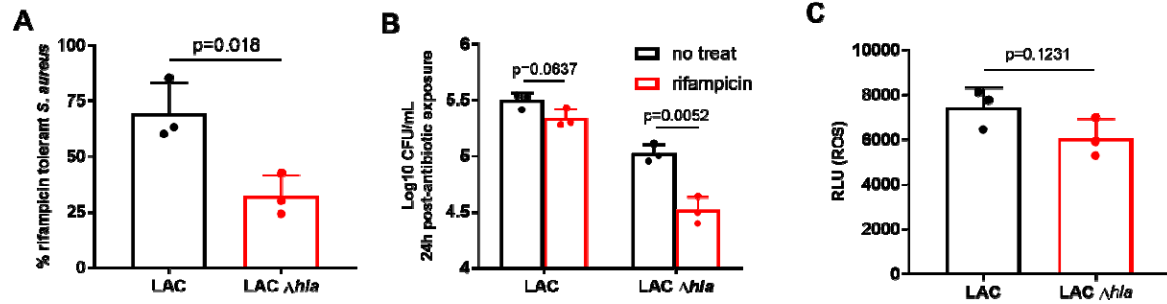

**Figure 1. Loss of  $\alpha$ -toxin increases antibiotic susceptibility in macrophages.** (A,B) BMDMs were infected at MOI 10 for 45min, followed by treatment with 10 $\mu$ g/ml rifampicin for 24h. % survival (A) was extrapolated from CFU/ml (B). (C) ROS levels measured by L-012 luminescence in BMDMs infected for 45min at MOI 10 with LAC or LAC  $\Delta hla$ . See also supplement figure 1. Statistical significance was determined by unpaired student's t-test (A,C) or One-way ANOVA (B). Assays were performed in biological triplicate (n=3). Experiments are repeated a minimum of 3 times to ensure reproducibility. Bars represent mean + standard deviation.

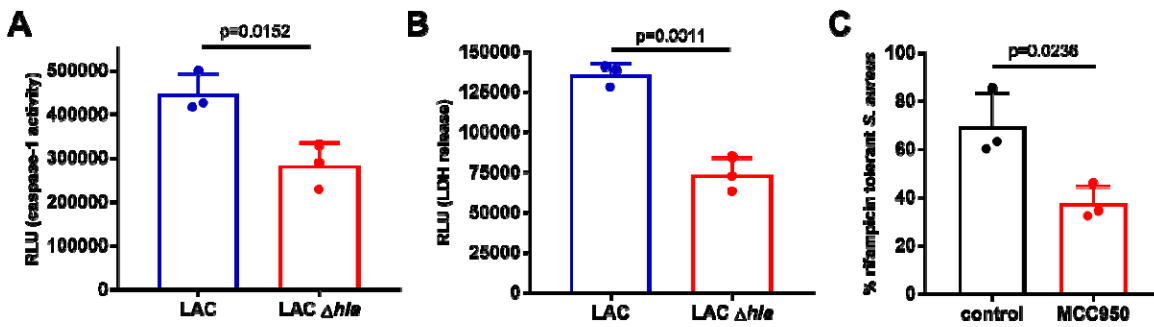

**Figure 2. NLRP3 inhibition increases antibiotic susceptibility of *S. aureus*.** (A) BMDMs were infected with LAC or LAC  $\Delta hla$  for 24h followed by measurement of caspase-1 activity by luminescence. (B) BMDMs were left uninfected or infected with LAC or LAC  $\Delta hla$  for 24h followed by quantification of LDH levels. (C) BMDMs were exposed to 100ng/ml lipopolysaccharide (LPS) for 2h, followed by replacement with serum-free media containing 10 $\mu$ M MCC950 for 30min prior to infection with WT LAC and treatment with 10 $\mu$ g/ml rifampicin for 24h. % survival of *S. aureus* recovered from BMDMs. % survival was extrapolated from CFU/ml at 24hpi (SFig 2A). Statistical significance was determined by unpaired student's t-test. Infections were performed in biological triplicate (n=3). Experiments are repeated a minimum of 3 times to ensure reproducibility. Bars represent mean +standard deviation.

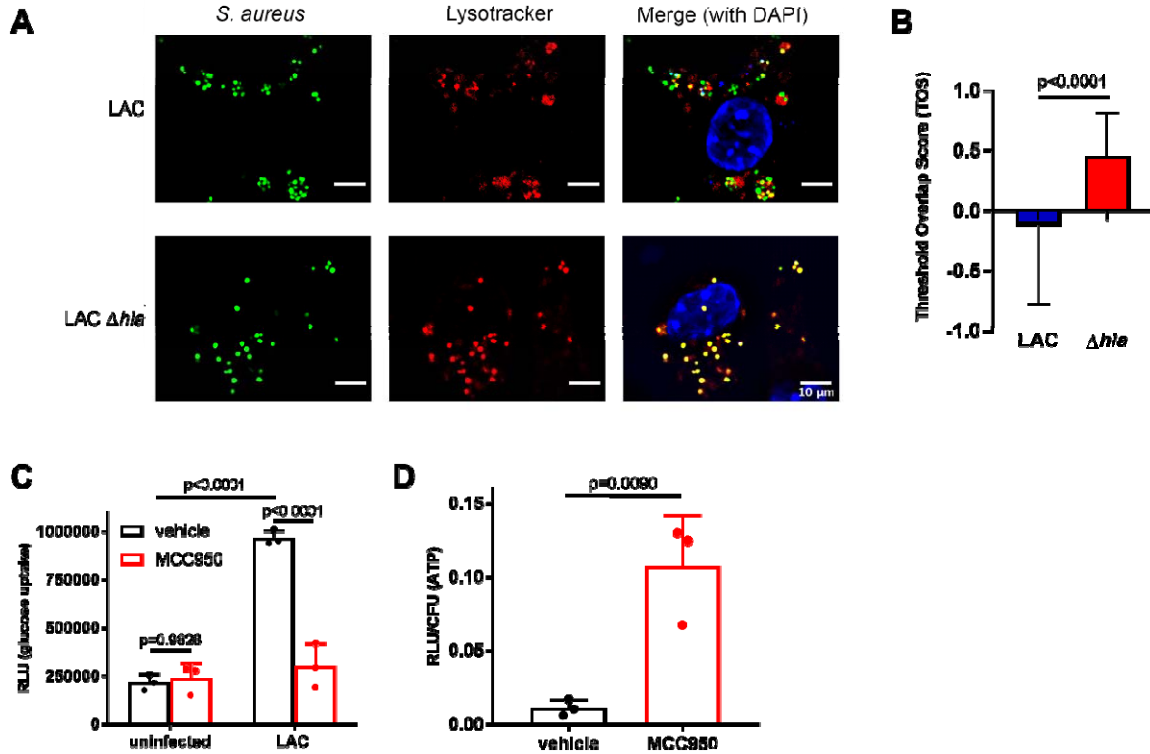

**Figure 3. NLRP3 activation induces antibiotic tolerance in the macrophage cytoplasm.** (A) Confocal microscopy of J774A.1 macrophages infected with GFP-expressing WT LAC or LAC  $\Delta hla$  at 24h, followed by staining with LysoTracker (phagolysosome) and DAPI. (B) Total overlap score (TOS) indicates colocalization, where a TOS of 1 represents total colocalization and a TOS of -1 represents anti-colocalization. (C) Glucose uptake into BMDMs was measured at 24hpi using the Glucose Uptake-Glo assay kit (Promega). BMDMs were either untreated or treated for 2h with 100ng/ml LPS, followed by 10 $\mu$ M MCC950 and infection at MOI 10 with WT LAC. (D) ATP levels in *S. aureus* as measured by luminescence. BMDMs treated with and without MCC950 prior to infection at MOI 10 with LAC::*lux*. Luminescence was measured and normalized to CFU. Statistical significance was determined by Student's t-test (B,D) or one-way ANOVA (C). All experiments were performed in biological triplicate (n=3) twice on two separate days (A-C) or three times on three separate days (D). Bars represent the mean + standard deviation.



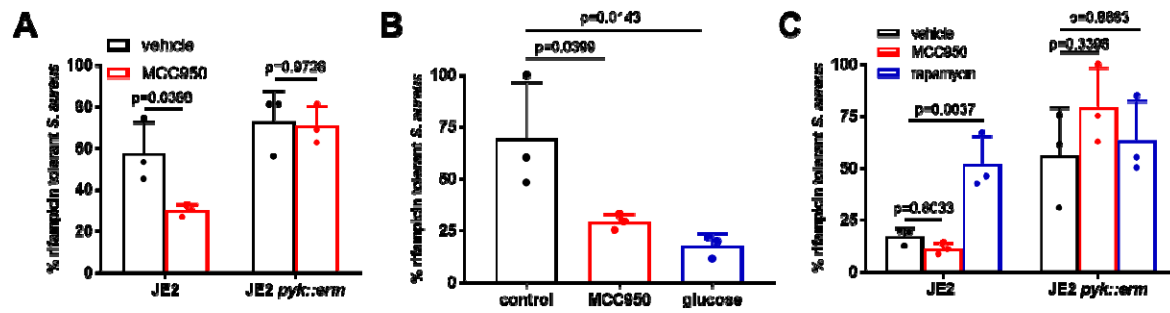

**Figure 4. Glucose utilization is directly linked to antibiotic tolerance.** (A) % rifampicin tolerance of *S. aureus* WT strain JE2 (black bars) or JE2 *pyk::erm* (blue bars) in BMDMs after 24h. BMDMs were infected at MOI 10 for 1h, followed by addition of 50µg/ml gentamicin +/- 10µg/ml rifampicin. (B) % rifampicin tolerance of *S. aureus* WT LAC in untreated or MCC950-treated BMDMs. BMDMs were infected at MOI 10 for 1h, followed by addition of 50µg/ml gentamicin +/- 10µg/ml rifampicin. At 20hpi, 0.2% glucose was added to the extracellular media, followed by CFU enumeration at 24h. (C) % rifampicin tolerance of *S. aureus* WT strain JE2 or JE2 *pyk::erm* in BMDMs after 24h. BMDMs were cultured in DMEM. Rapamycin-treated cells were incubated overnight in the presence of 100ng/ml rapamycin. BMDMs were infected at MOI 10 for 1h, followed by addition of 50µg/ml gentamicin +/- 10µg/ml rifampicin. See also supplementary figure 3. Statistical significance was determined by One-Way ANOVA. All experiments were performed in biological triplicate (n=3) twice on two separate days. Bars represent mean + standard deviation.



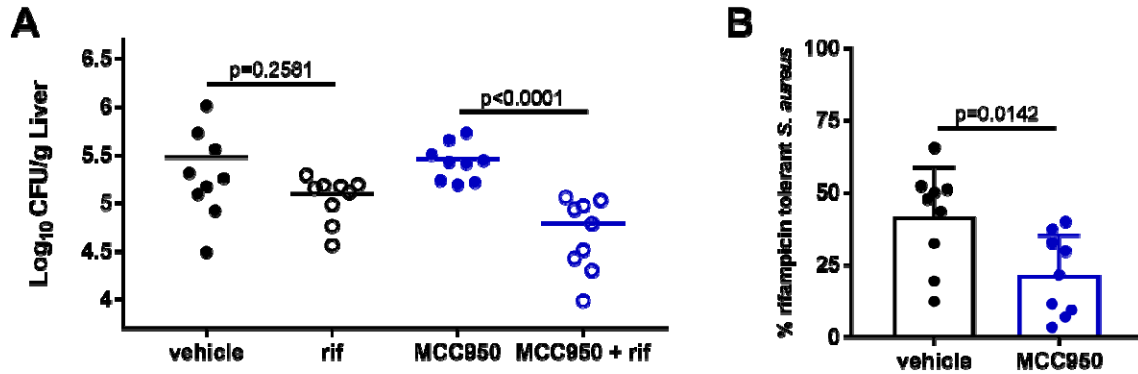

**Figure 5. NLRP3 inhibition improves antibiotic efficacy against systemic *S. aureus* infection.** WT C57B6/J mice were treated with 50mg/kg MCC950 by ip for 1 hour prior to infection, followed by tail vein iv infection with *S. aureus* strain HG003. At 24hpi, mice were administered 25mg/kg rifampicin (rif) or vehicle control by ip injection. (A) At 48hpi, *S. aureus* burden was enumerated in the liver. (B) % antibiotic tolerant *S. aureus* in vehicle versus MCC950-treated mice. See also supplemental figure 4. Each data represents one mouse from two experiments performed on two separate days (total n=9 per group). Statistical significance was determined by Mann-Whitney test comparing untreated to rifampicin treated.

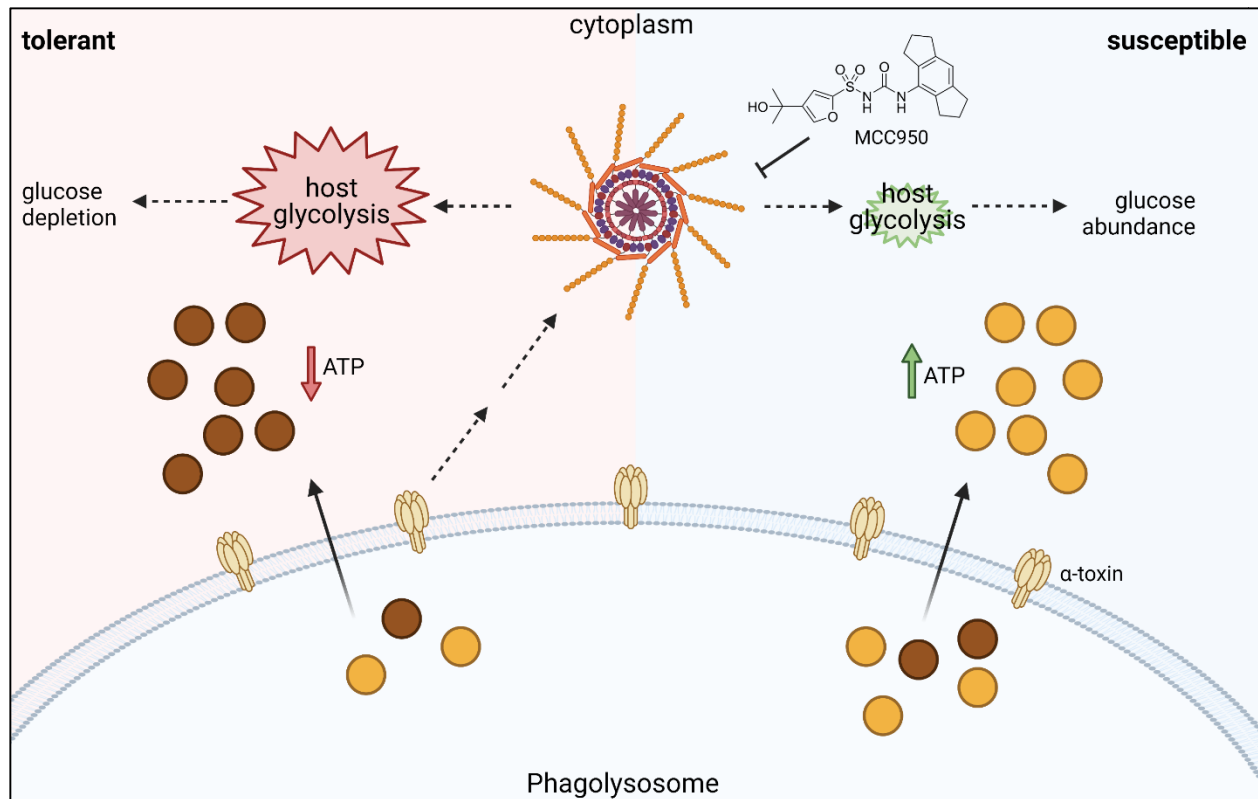

**Figure 6. Proposed mechanism for NLRP3-mediated antibiotic tolerance in *S. aureus*.**

*Staphylococcus aureus*  $\alpha$ -toxin activates NLRP3 and mediates escape from the phagolysosome. (left) Activation of NLRP3 increases host glycolytic activity, depleting the cytoplasm of glucose. *S. aureus* enters a low energy state (brown circles), hallmarked by low ATP, and is tolerant to antibiotics. (right) Pharmacologic inhibition of NLRP3 by MCC950 leads to decreased host glycolytic activity, leading to high levels of cytoplasmic glucose. *S. aureus* preferentially metabolizes glucose via glycolysis, leading to a high energy state (yellow circles), high ATP, and is thus sensitive to antibiotics.
